# Supplementary material for: New Classification for the Combined Assessment of the Fractional Excretion of Urea Nitrogen and Estimated Plasma Volume Status in Acute Heart Failure
Source: PubMed Central journal article supplement — J Am Heart Assoc. 2022 Dec 30;12(1):e025596. doi: 10.1161/JAHA.122.025596 (PMC9973588; doi:10.1161/jaha.122.025596), 2022-12-30
Supplement: JAH3-12-e025596-s001.pdf [file JAH3-12-e025596-s001.pdf]

## **SUPPLEMENTAL MATERIAL**

**Figure S1A.** Kaplan–Meier analyses of the four hemodynamic profiles based on the combined assessment of FEUN and ePVS values at discharge for post-discharge all-cause mortality in patients with eGFR < 60 mL/min/1.73 m<sup>2</sup>.

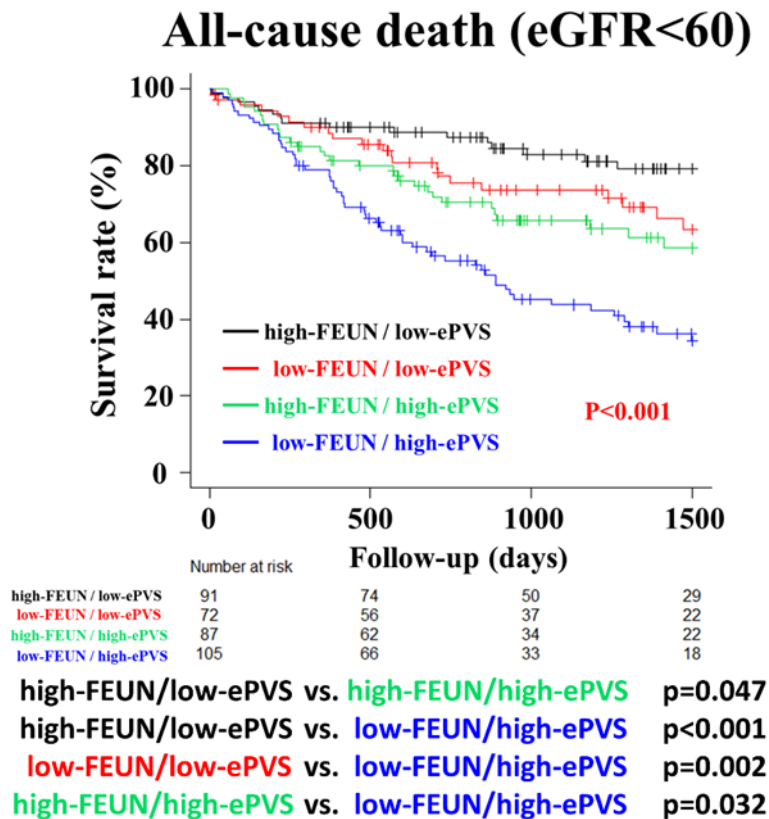

In patients with eGFR<60 mL/min/1.73 m<sup>2</sup>, the Kaplan–Meier curve analyses showed that the low-FEUN/high-ePVS group had much higher rates of all-cause death than the other three groups (log-rank test with Bonferroni post hoc analysis, vs. the high-FEUN/low-ePVS group :  $P < 0.001$ , vs. the low-FEUN/low-ePVS group :  $P = 0.002$ , vs. the high-FEUN/high-ePVS group :  $P = 0.032$ ).

**Figure S1B.** Kaplan–Meier analyses of the four hemodynamic profiles based on the combined assessment of FEUN and ePVS values at discharge for post-discharge all-cause mortality in patients with  $eGFR \geq 60$  mL/min/1.73 m<sup>2</sup>.

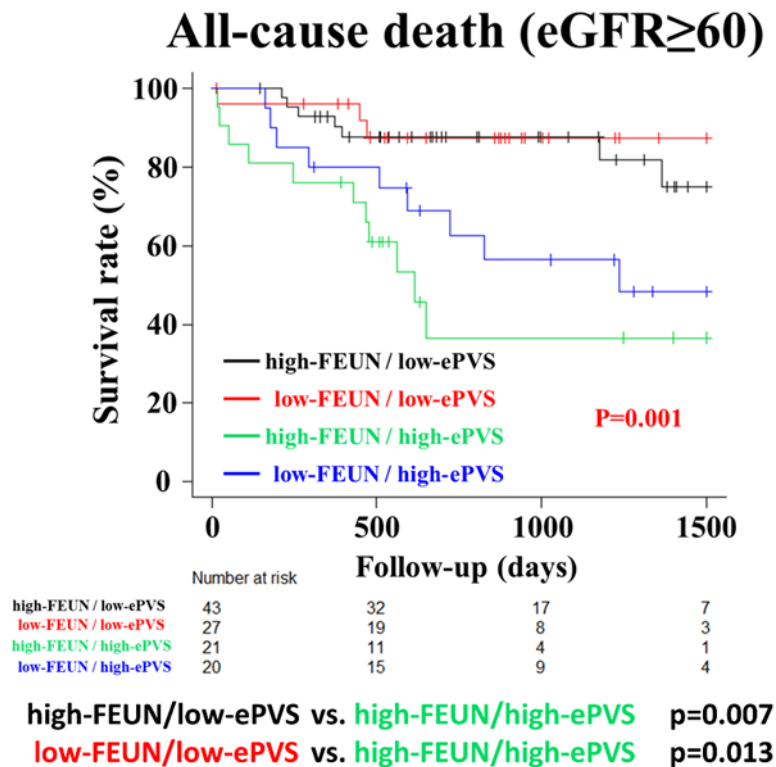

In patients with  $eGFR \geq 60$  mL/min/1.73 m<sup>2</sup>, the Kaplan–Meier curve analyses showed that there were no significant differences in the all-cause death between the low-FEUN/high-ePVS group and the other three groups.

**Figure S2.** Kaplan–Meier analyses of the four hemodynamic profiles based on the combined assessment of FEUN and ePVS values at discharge for HF readmission without death (Competing-risk analysis).

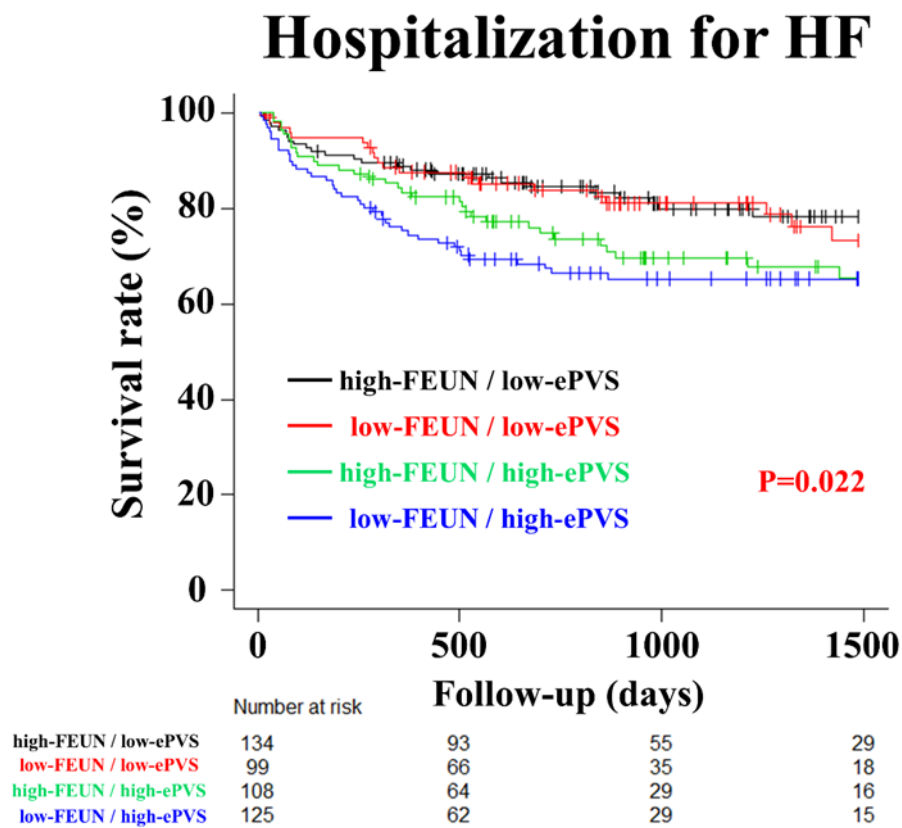

A competing-risk analysis was performed to assess the effect of death as a competing risk and similar result was observed (Gray test,  $P=0.022$ ) (Figure S1).

Abbreviations: FEUN, fractional excretion of urea nitrogen; ePVS, estimated plasma volume status; HF, heart failure
